# Supplementary material for: Pre-transplantational Control of the Post-transplantational Fate of Human Pluripotent Stem Cell-Derived Cartilage
Source: PubMed Central journal article supplement — Stem Cell Reports. 2018 Jul 26;11(2):440–53. doi: 10.1016/j.stemcr.2018.06.021 (PMC6092881; doi:10.1016/j.stemcr.2018.06.021), 2018-07-26
Supplement: mmc1.pdf [file mmc1.pdf]

**Stem Cell Reports, Volume 11**

**Supplemental Information**

**Pre-transplantational Control of the Post-transplantational Fate of Human Pluripotent Stem Cell-Derived Cartilage**

**John Y. Lee, Nadine Matthias, Azim Pothiawala, Bryan K. Ang, Minjung Lee, Jia Li, Deqiang Sun, Sebastien Pigeot, Ivan Martin, Johnny Huard, Yun Huang, and Naoki Nakayama**

## 1. SUPPLEMENTAL FIGURES

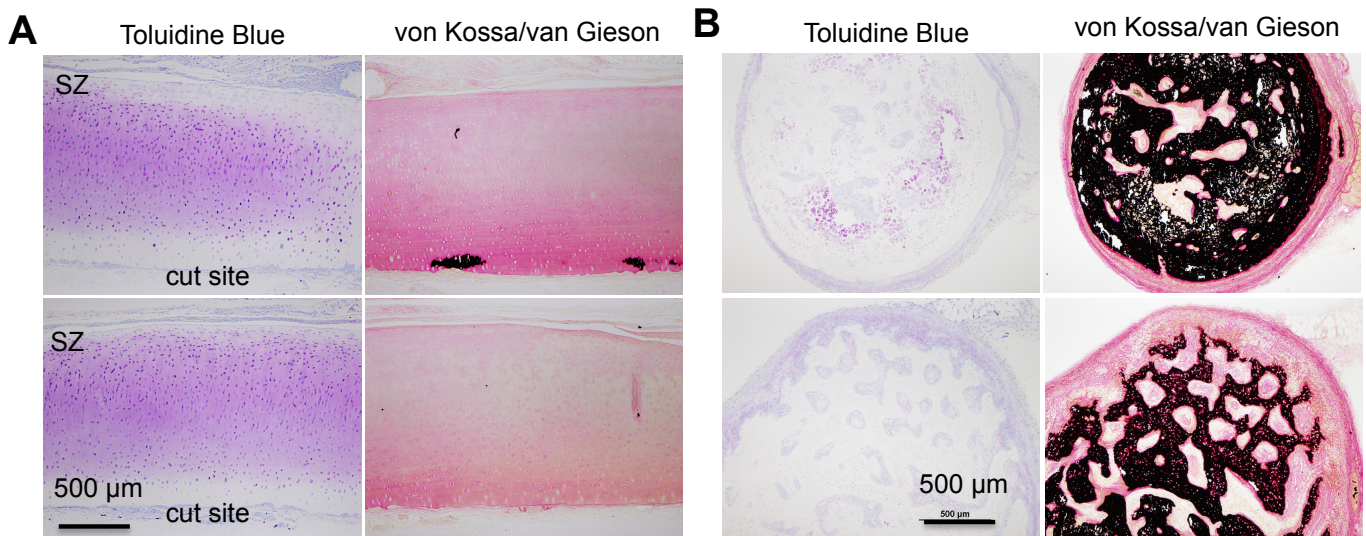

**Fig. S1 *In vivo* cartilage stability assayed by subcutaneous transplantation into NSG mice.**

**(A) Bovine articular cartilage.** A piece of 2-year-old bovine knee articular cartilage subcutaneously transplanted for 12 weeks in NSG mice. Note that some areas of the cut site (in mid zone) but not the untouched natural surface (superficial zone, SZ) were mineralized. **(B) Cartilage pellet from FSBc-expanded human paraxial mesoderm.** Bony tissue with no cartilaginous areas (Toluidine Blue [TB]<sup>-</sup> von Kossa [VK]<sup>+</sup>) detected 9 weeks after subcutaneous transplantation of cartilage pellets developed under PTB (PDGF+TGFβ+BMP4) conditions from expanded hESC-derived paraxial mesodermal cells (passage 4). They were more prone to mineralization than cartilage pellets made with uncultured paraxial mesoderm (Umeda, et al. 2015). Supplementary to Fig. 6.

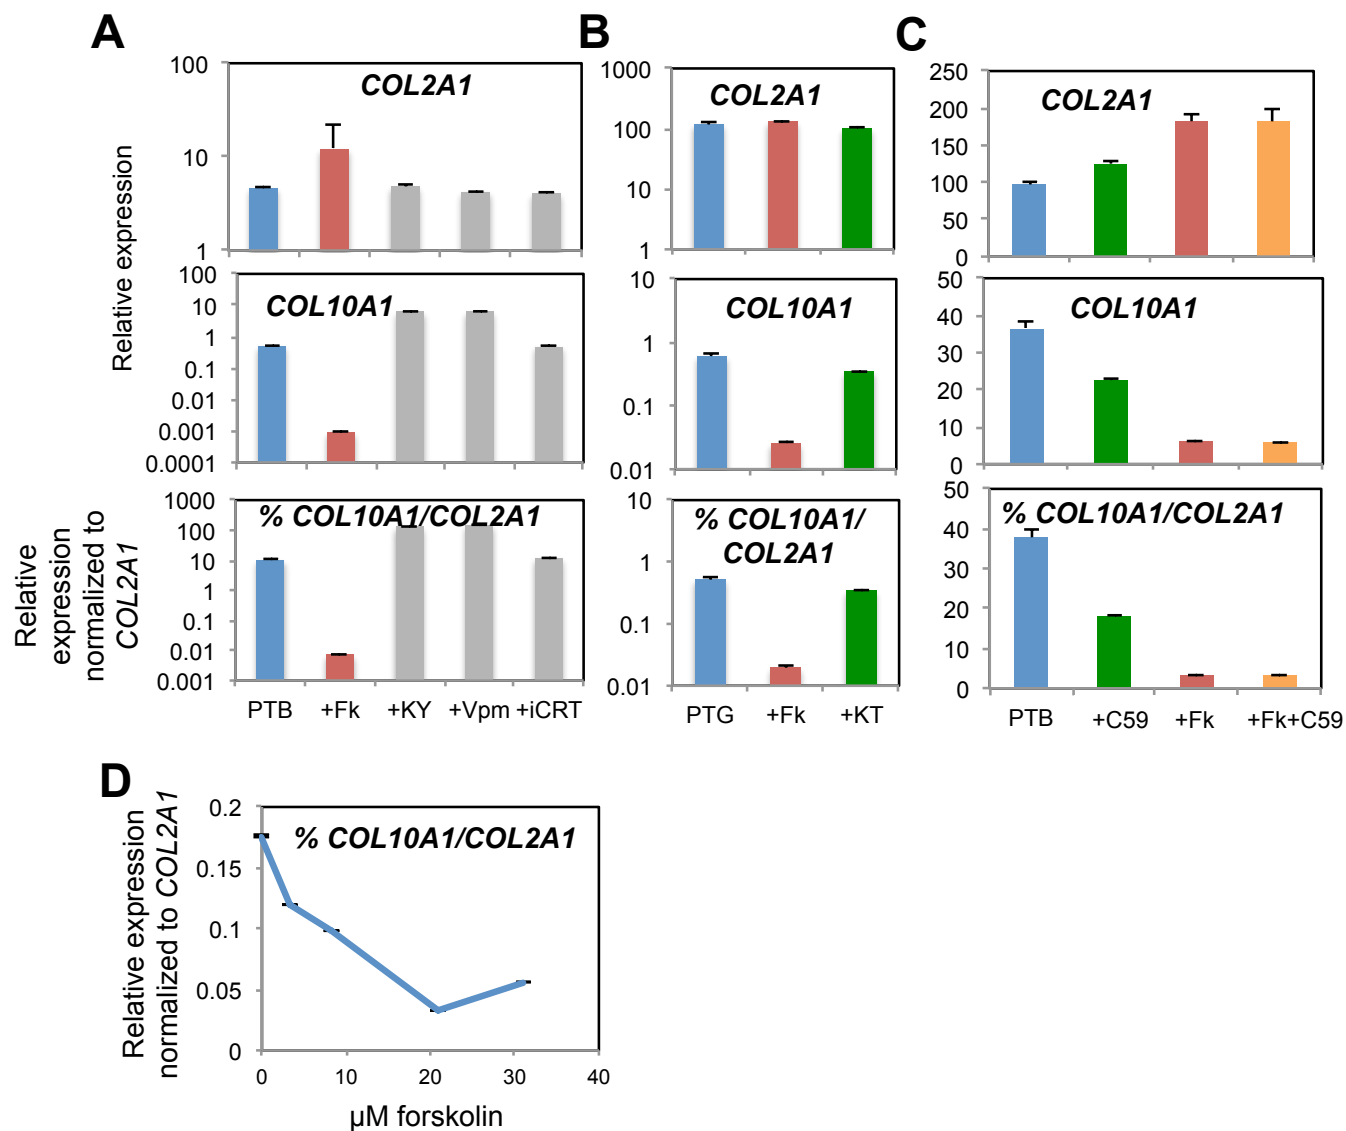

**Fig. S2 Functional screening by RT-PCR of small molecules that suppress hypertrophic differentiation of chondrocytes.**

(A-C) Chondrogenesis using hESC-derived ectomesenchymal cells was performed under PTB (PDGF+TGFβ+BMP4) or PTG (PDGF+TGFβ+GDF5) conditions with forskolin (Fk), KY02111 (KY), Verapamil (Vpm) or iCRT14 (iCRT) (A), with Fk or KT5823 (KT) (B), and with Fk, 30 nM Wnt-C59 (C59), or Fk+C59 (C). The small molecules were added on day 11, except for C59, which was added on day 24. Pellets were harvested on day 32. (D) Chondrogenesis using hESC-derived ectomesenchymal cells was performed with 3, 9, 20, and 30 μM forskolin. Supplementary to Fig. 1D-G.

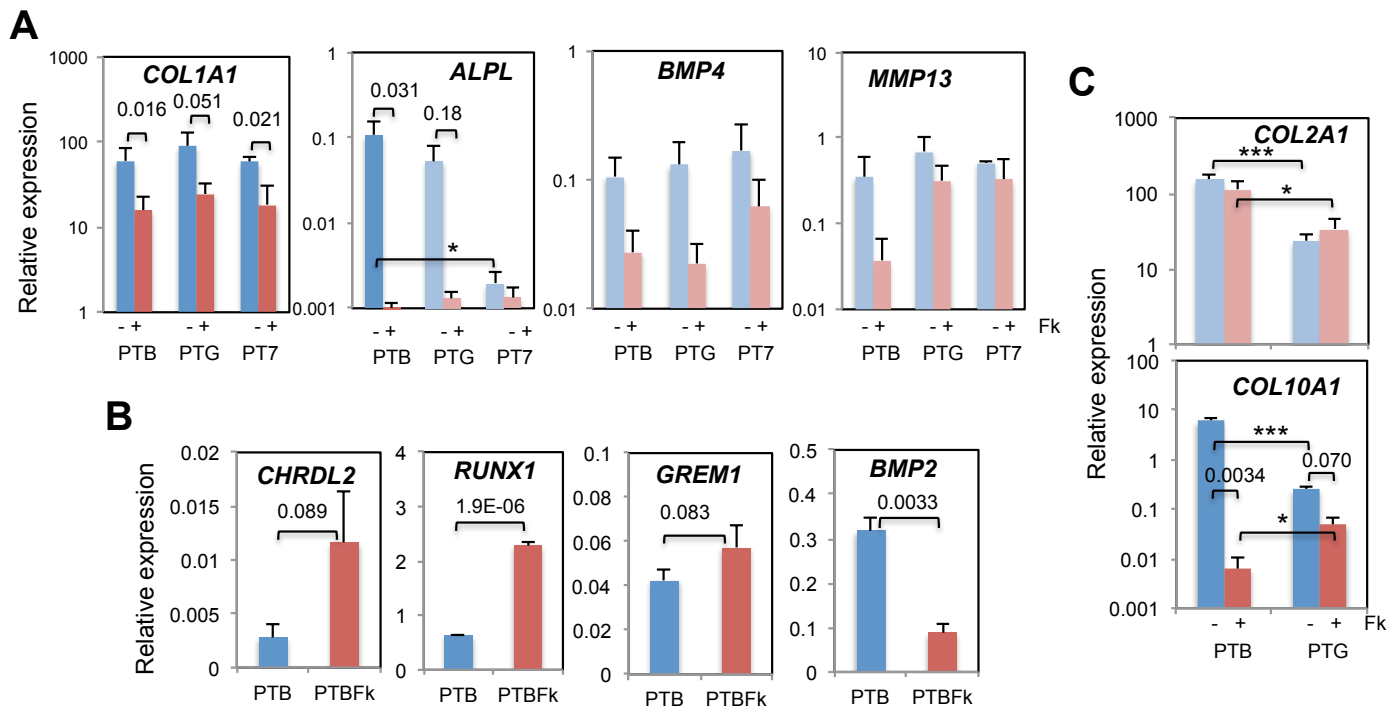

**Fig. S3 Gene expression profiling by RT-PCR in forskolin-treated and untreated cartilage pellets.** (A, B) Chondrogenesis using hESC-derived ectomesenchymal cells was performed under PTB (PDGF+TGFβ+BMP4), PTG (PDGF+TGFβ+GDF5), and PT7 (PDGF+TGFβ+BMP7) conditions, with (Brown: +Fk) or without (Blue: -Fk) forskolin. (A) Mean expression levels of chondrocyte genes are shown with SEM and *P*-values (+/-Fk comparison, values of *P*>0.2 are not shown). *COL1A1*: n (independent experiments)=7, *ALPL*: n=3-5, other comparisons \**P*=0.10, *BMP4*: n=3, *MMP13*: n=3. Supplementary to Fig. 2A. (B) RT-PCR confirmation of RNA-seq data. n=3-4. Supplementary to Fig. 5EF. (C) Cartilage from SOX9-GFP hiPSC-derived ectomesenchymal cells made under PTB and PTG conditions with (brown) or without (blue) Fk. Mean expression levels with SEM and *P*-values (+/-Fk comparison) are shown (n=3-4). Supplementary to Fig. 1G. Other comparisons: *COL2A1*: \**P*=0.070, \*\*\**P*=0.0035, *COL10A1*: \**P*=0.083, \*\*\**P*=0.0034.

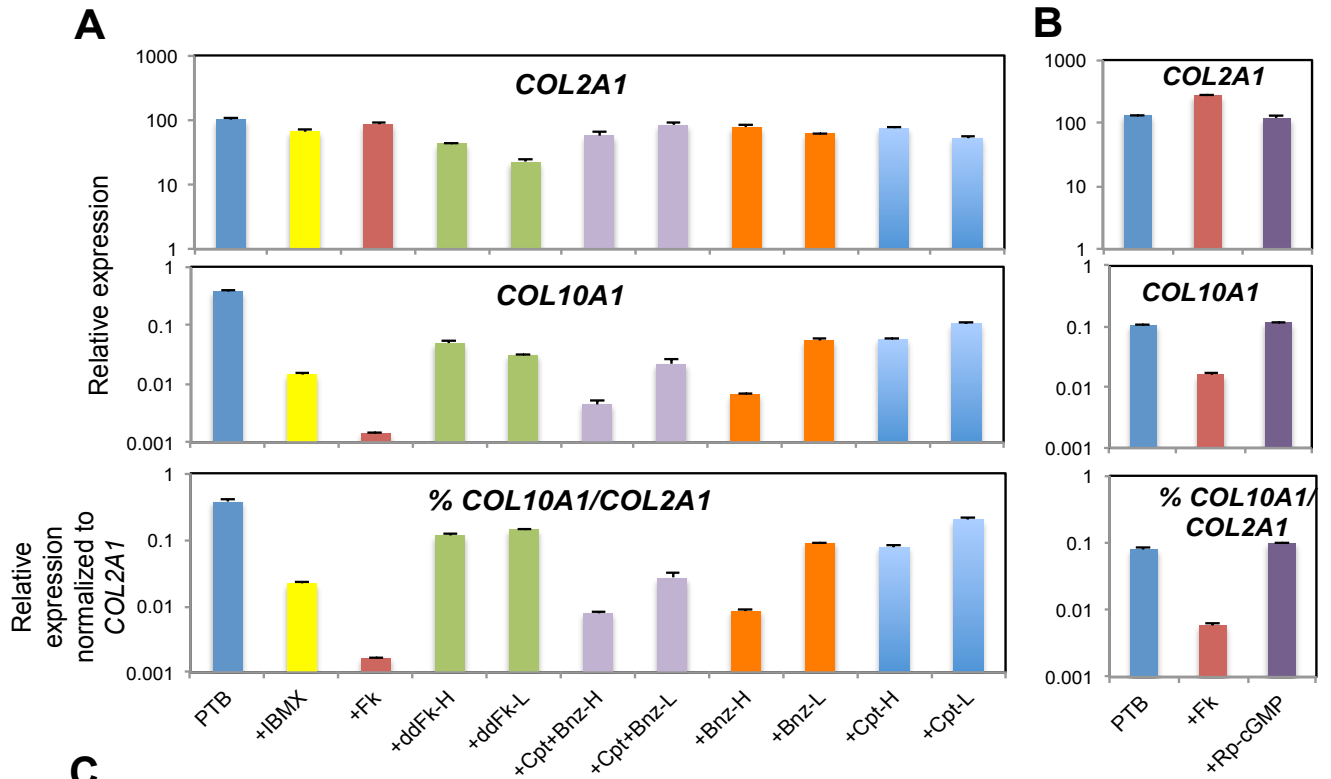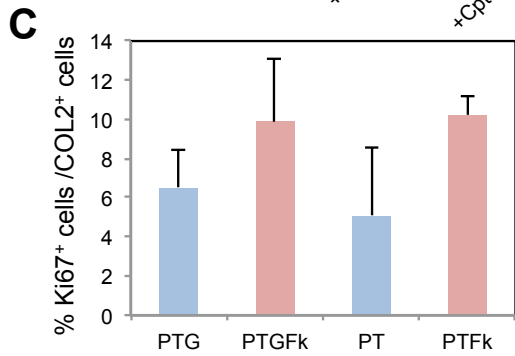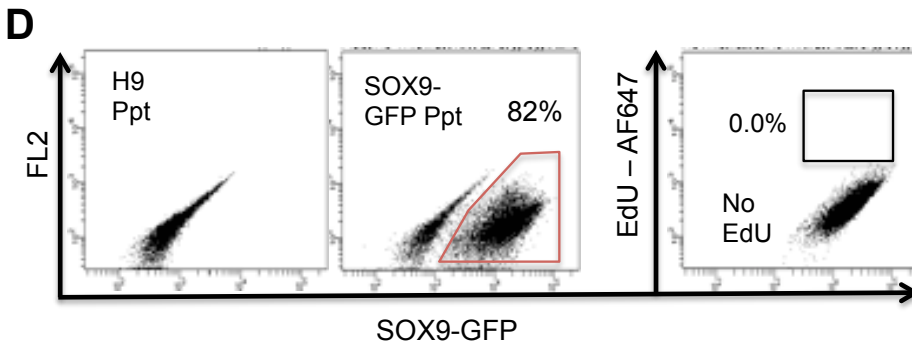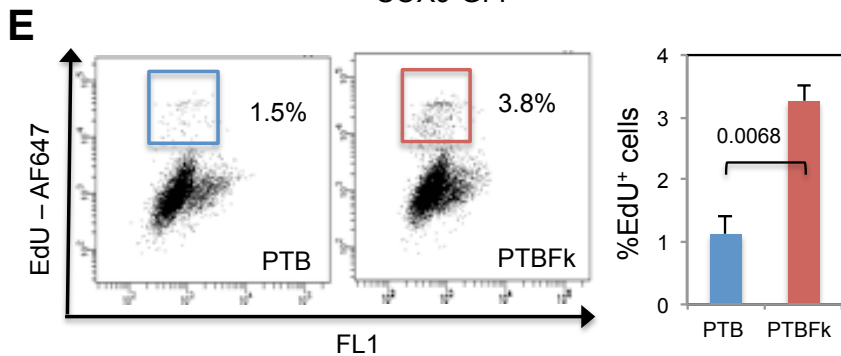

**Fig. S4 Effect of cAMP/cGMP analogs on COL10A1 expression during chondrogenesis.**

Chondrogenesis using hESC-derived ectomesenchymal cells was performed under PTB (PDGF+TGF $\beta$ +BMP4) conditions for 33 days (**A**) with 0.5 mM IBMX, 25  $\mu$ M forskolin (Fk), 12.5  $\mu$ M (L) and 25  $\mu$ M (H) 1,9-dideoxyforskolin (ddFk), 3  $\mu$ M (L) and 6  $\mu$ M (H) CPT-cAMP (Cpt), 40  $\mu$ M (L) and 80  $\mu$ M (H) Bnz-cAMP (Bnz), 3  $\mu$ M CPT-cAMP+40  $\mu$ M Bnz-cAMP (Cpt+Bnz-L), and 6  $\mu$ M CPT-cAMP+80  $\mu$ M Bnz-cAMP (Cpt+Bnz-H), and (**B**) with 25  $\mu$ M forskolin (Fk), and 60  $\mu$ M Rp-cGMP, added on day 11. Supplementary to Fig. 3A.

**Forskolin effects on the proliferation of chondrocytes in cartilage pellets.**

(**C**) Ki67 staining. PTG (PDGF+TGF $\beta$ +GDF5) vs. PTG+forskolin (PTGFk):  $P=0.40$  (n=4). PT (PDGF+TGF $\beta$ ) vs. PTFk:  $P=0.28$  (n=2-3). Statistically insignificant differences. Supplementary to Fig. 3C (**D**) Without EdU labeling control for Fig. 3D. (**E**) EdU labeling of Fk treated and untreated cartilage pellets generated from H9 hESC-derived ectomesenchymal cells. Left Panels: representative FACS plots. Right panel: Mean % positive cells with SEM and  $P$ -value. n=3. Supplementary to Fig. 3D.

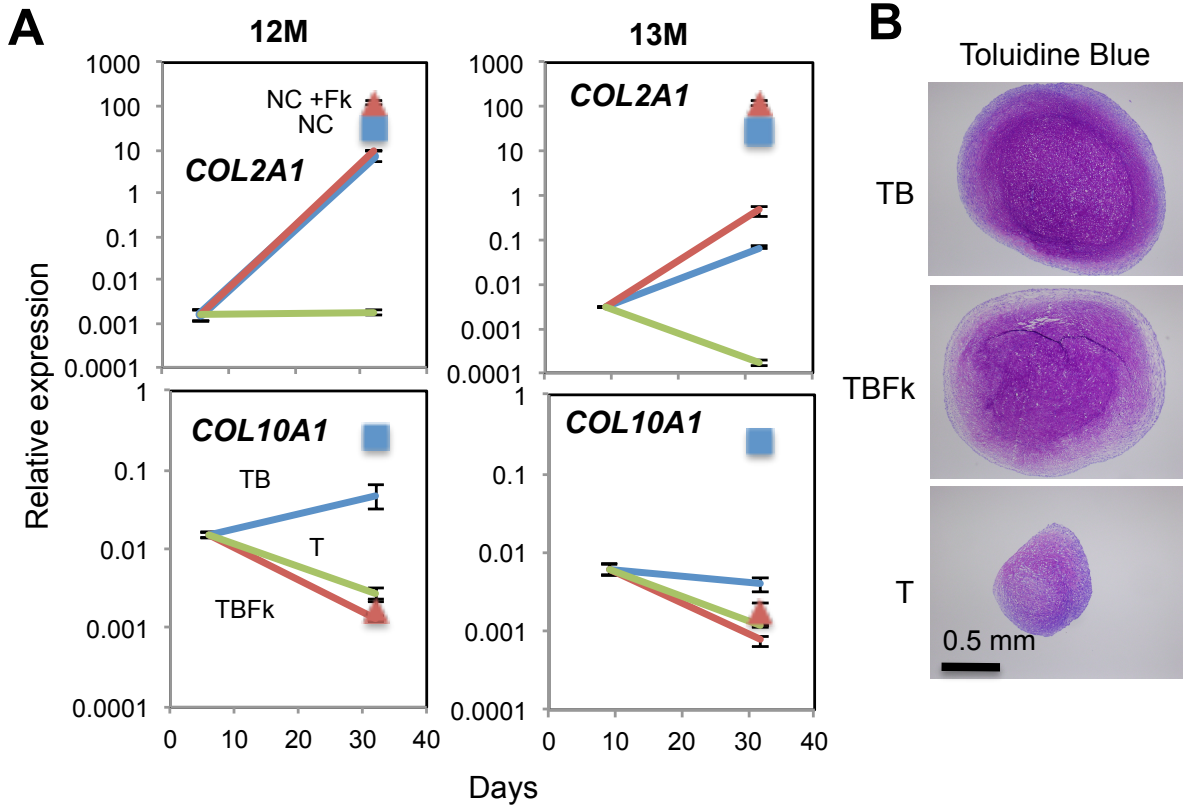

**Fig. S5 Forskolin effects on chondrogenesis from dedifferentiated adult human nasal chondrocytes.**

(A) Nasal chondrocytes from 2 male patients (12M, 13M) were individually differentiated in the presence of TGF $\beta$  alone (T) as described (Pelttari et al., 2014), or under modified conditions (TB: TGF $\beta$ +BMP4, and TBFk: TGF $\beta$ +BMP4+forskolin). On days 6 and 32, cartilage pellets were harvested and subjected to real-time RT-PCR. Supplementary to Fig. 4E. Blue square (NC): cartilage from hESC-ectomesenchymal cells formed under PTB (PDGF+TGF $\beta$ +BMP4), Brown triangle (NC+Fk): cartilage formed under PTBFk. (B) Supplementary to Fig. 4F. Toluidine blue (sGAG) staining of the same cartilage pellet samples.

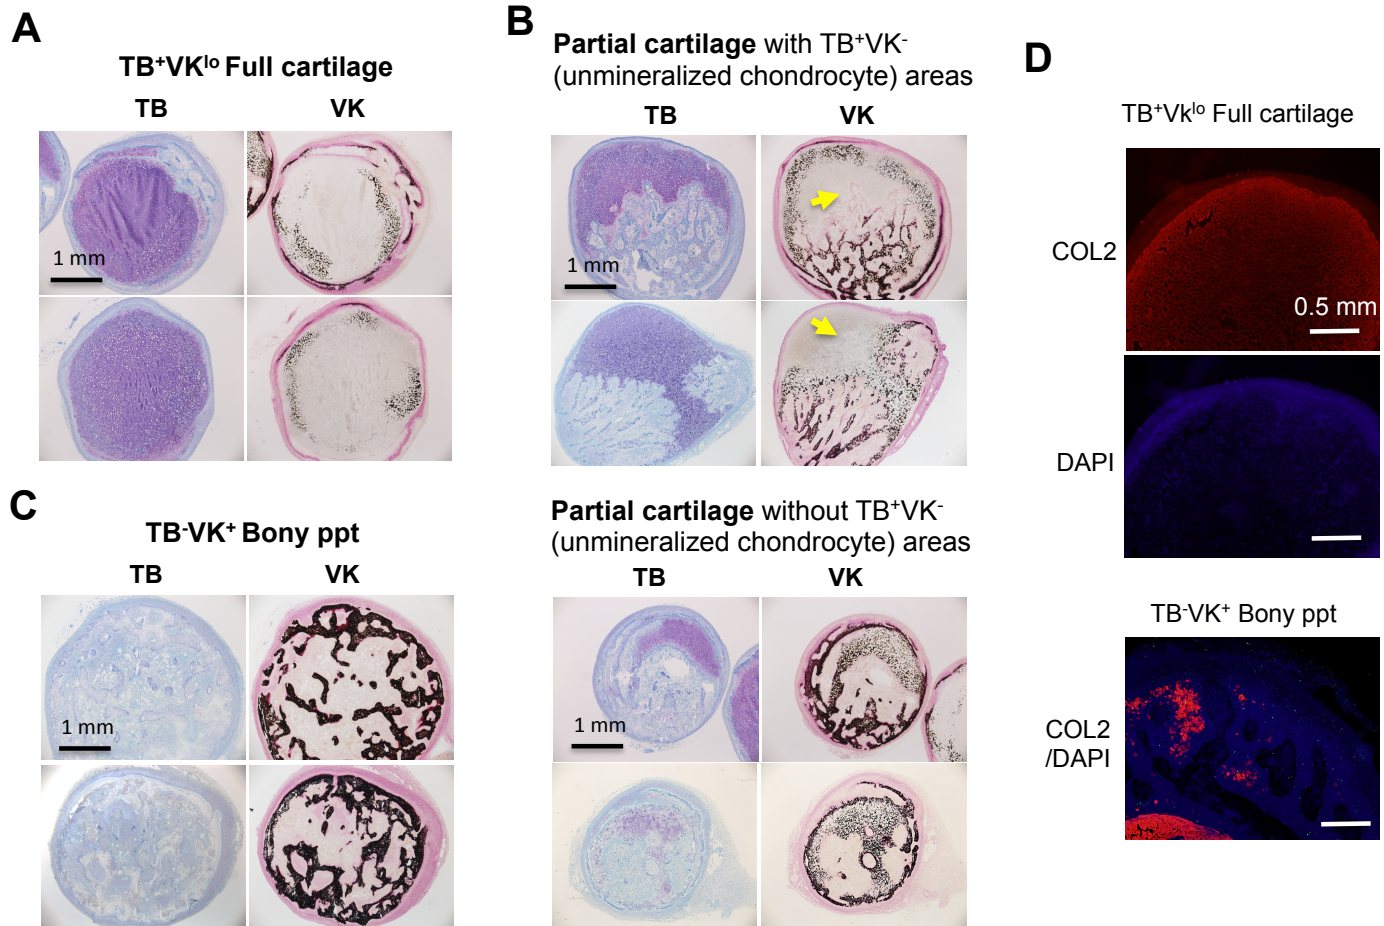

**Fig. S6 Types of cartilage recovered from the 8-week ectopic transplantation.**

(A) TB<sup>+</sup>VK<sup>lo</sup> full cartilage: >80% area (usually the periphery of cartilage pellets did not stain) shows metachromatic (pink-purple) staining with Toluidine blue (TB) and consists largely of unmineralized chondrocytes. However, pellets often contained some mineralized chondrocytes that stained weakly with von Kossa (VK). (B) Partial cartilage containing bony area and cartilaginous area. Upper panel: The cartilaginous area contains groups of unmineralized chondrocytes (yellow arrows). Lower panels: The cartilaginous area contains mostly mineralized chondrocytes. (C) TB<sup>-</sup>VK<sup>+</sup> bony pellet (ppt): Mostly consisting of bony areas stained densely with VK, often containing TB<sup>-</sup>VK<sup>-</sup> marrow-like areas, but without TB<sup>+</sup> cartilaginous area. (A-C) Supplementary to Fig. 6B. (D) Lower magnification (using x4 objective lens) photos of the immunofluorescence staining of the Fig. 6C post-transplantation pellets.



**A**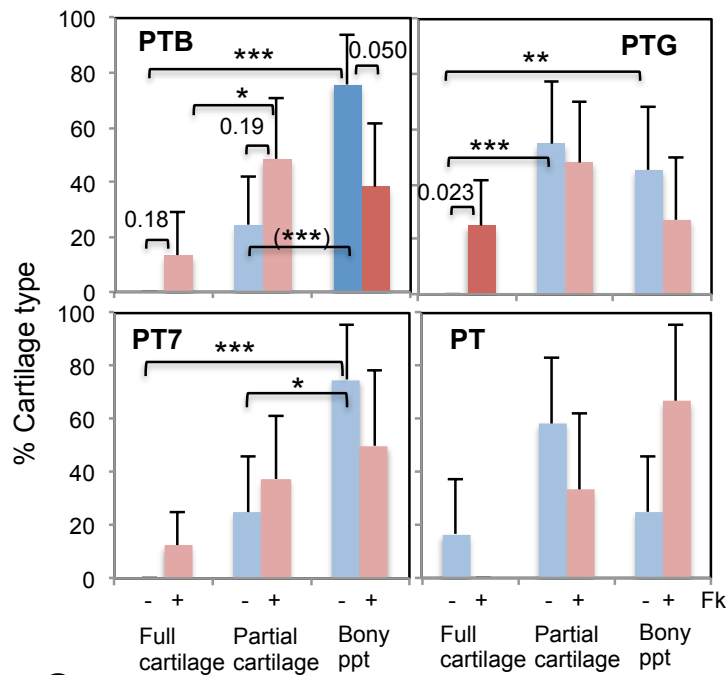**B**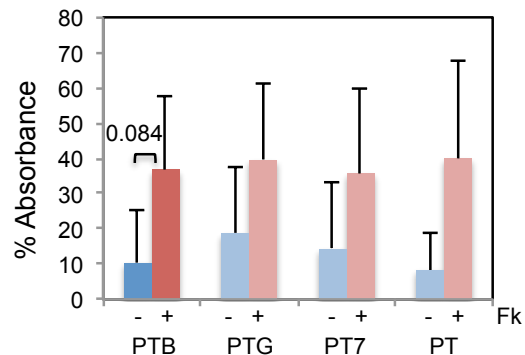**C**

| Ppt culture condition | TB <sup>+</sup> Vk <sup>lo</sup> Full cartilage (% viable ppts) | Partial cartilage (% viable ppts) | TB <sup>+</sup> Vk <sup>+</sup> Bony ppt (% viable ppts) | Recovered (viable) ppts | Absorbed ppts (% total ppts) | Transplanted (total) ppts |
|-----------------------|-----------------------------------------------------------------|-----------------------------------|----------------------------------------------------------|-------------------------|------------------------------|---------------------------|
| PTB                   | 0 (0)                                                           | 5 (24)                            | 16 (76)                                                  | 21                      | 3 (13)                       | 24                        |
| PTB Fk                | 2 (12)                                                          | 8 (47)                            | 7 (41)                                                   | 17                      | 8 (32)                       | 25                        |
| PTG                   | 0 (0)                                                           | 6 (36)                            | 7 (64)                                                   | 13                      | 3 (19)                       | 16                        |
| PTG Fk                | 5 (36)                                                          | 6 (43)                            | 5 (21)                                                   | 16                      | 7 (30)                       | 23                        |
| PT7                   | 0 (0)                                                           | 2 (25)                            | 6 (75)                                                   | 8                       | 3 (27)                       | 11                        |
| PT7 Fk                | 2 (25)                                                          | 3 (38)                            | 3 (38)                                                   | 8                       | 3 (27)                       | 11                        |
| PT                    | 1 (14)                                                          | 5 (57)                            | 2 (29)                                                   | 8                       | 1 (11)                       | 9                         |
| PT Fk                 | 0 (0)                                                           | 1 (33)                            | 2 (67)                                                   | 3                       | 4 (57)                       | 7                         |

**D**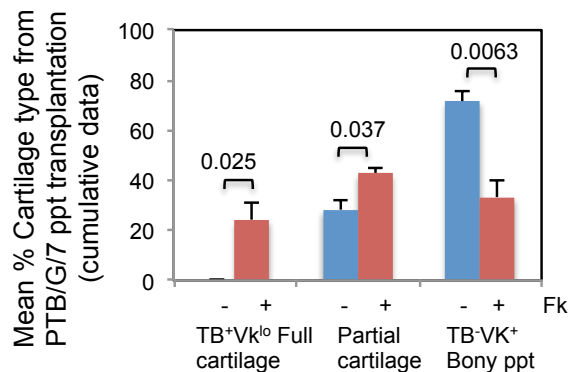**E**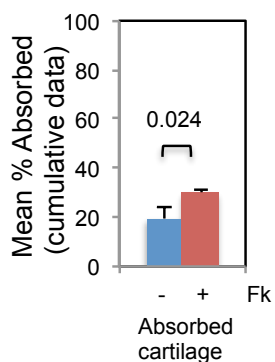

## **Fig. S7 Post-transplantation cartilage phenotypes:**

### **Statistical analyses.**

(A) Recovery of each of TB<sup>+</sup>VK<sup>lo</sup> full cartilage, partial cartilage, and TB<sup>-</sup>VK<sup>+</sup> bony pellet (ppt) after the 8-week ectopic transplantation of forskolin (Fk)-treated (Brown) and untreated (Blue) cartilage pellets was averaged and plotted with corresponding SEM and *P*-value (+/- Fk comparison, values of *P*>0.2 are not shown). PTB (PDGF+TGFβ+BMP4): n=9-10. PTG (PDGF+TGFβ+GDF5): n=7-8, PT7 (PDGF+TGFβ+BMP7): n=5-6, PT (PDGF+TGFβ): n=3-6. Other comparisons: PTB: \**P*=0.060, \*\*\**P*=9.1E-07, (\*\*\*)*P*=0.0032, PTG: \*\**P*=0.023, \*\*\**P*=0.0082, PT7: \**P*=0.065, \*\*\**P*=0.0014. Supplementary to Fig. 6D. (B) Pellet loss after the 8-week ectopic transplantation from each transplantation experiment was averaged and plotted with corresponding SEM and *P*-values (+/-Fk comparison). Supplementary to Fig. 6D.

### **Cumulative data analyses.**

(C) The number of recovered TB<sup>+</sup>VK<sup>lo</sup> full cartilage, partial cartilage, and TB<sup>-</sup>VK<sup>+</sup> bony pellets (ppts) as well as the number of absorbed pellets after the 8-week ectopic transplantation of forskolin (Fk)-treated (Brown) and untreated (Blue) cartilage pellets were summed. Supplementary to Fig. 6D. (D) The % Full cartilage, % Partial cartilage and % Bony pellet (ppt) values from transplanted pellets produced under PTB (PDGF+TGFβ+BMP4), PTG (PDGF+TGFβ+GDF5) and PT7 (PDGF+TGFβ+BMP7) conditions, and those from PTB+Fk (PTBFk), PTGFk and PT7Fk conditions, shown in (C) were averaged and plotted with SEM with *P*-values. Supplementary to Fig. 6E (E) The % absorbed pellet values from transplanted pellets produced under PTB, PTG and PT7 conditions and those from PTBFk, PTGFk and PT7Fk conditions, shown in (C) were also averaged and plotted with SEM and *P*-value. Supplementary to Fig. 6E.

## 2. SUPPLEMENTAL TABLES

Table S1. Top GO Terms (Biological Process)  $P < 1.0E-10$

| Top 20                     | Gene set names                                 | P        | FDR q    |
|----------------------------|------------------------------------------------|----------|----------|
| <b>Fk induced genes</b>    | <b>( PTBFk &gt; PTB )</b>                      |          |          |
| GO:0007059                 | chromosome segregation                         | 5.71E-17 | 8.86E-13 |
| GO:0098813                 | nuclear chromosome segregation                 | 5.86E-17 | 4.54E-13 |
| GO:0000819                 | sister chromatid segregation                   | 1.57E-16 | 8.11E-13 |
| GO:0007275                 | multicellular organism development             | 1.89E-16 | 7.31E-13 |
| GO:0048856                 | anatomical structure development               | 3.10E-16 | 9.61E-13 |
| GO:0032502                 | developmental process                          | 6.38E-16 | 1.65E-12 |
| GO:0048731                 | system development                             | 1.06E-15 | 2.34E-12 |
| GO:0032501                 | multicellular organismal process               | 3.09E-15 | 5.98E-12 |
| GO:0000280                 | nuclear division                               | 8.68E-15 | 1.49E-11 |
| GO:0000278                 | mitotic cell cycle                             | 1.25E-14 | 1.94E-11 |
| GO:0051301                 | cell division                                  | 1.26E-14 | 1.77E-11 |
| GO:0048285                 | organelle fission                              | 3.94E-14 | 5.09E-11 |
| GO:0022402                 | cell cycle process                             | 7.15E-14 | 8.53E-11 |
| GO:1903047                 | mitotic cell cycle process                     | 1.26E-13 | 1.40E-10 |
| GO:0007049                 | cell cycle                                     | 2.13E-13 | 2.20E-10 |
| GO:0000070                 | mitotic sister chromatid segregation           | 7.61E-13 | 7.37E-10 |
| GO:0140014                 | mitotic nuclear division                       | 7.86E-13 | 7.17E-10 |
| GO:0051239                 | regulation of multicellular organismal process | 6.59E-12 | 5.67E-09 |
| GO:0009790                 | embryo development                             | 1.16E-11 | 9.48E-09 |
| GO:0009653                 | anatomical structure morphogenesis             | 1.85E-11 | 1.44E-08 |
| <b>Fk suppressed genes</b> | <b>( PTB &gt; PTBFk )</b>                      |          |          |
| GO:0048731                 | system development                             | 1.66E-17 | 2.57E-13 |
| GO:0007275                 | multicellular organism development             | 2.57E-17 | 1.99E-13 |
| GO:0048856                 | anatomical structure development               | 3.92E-16 | 2.02E-12 |
| GO:0009888                 | tissue development                             | 1.76E-15 | 6.83E-12 |
| GO:0032502                 | developmental process                          | 3.88E-15 | 1.2E-11  |
| GO:0032879                 | regulation of localization                     | 1.04E-12 | 2.7E-09  |
| GO:0032501                 | multicellular organismal process               | 1.36E-12 | 2.64E-09 |
| GO:0048513                 | animal organ development                       | 2.26E-12 | 3.9E-09  |
| GO:0007154                 | cell communication                             | 3.71E-12 | 5.75E-09 |
| GO:0050793                 | regulation of developmental process            | 6.68E-12 | 7.97E-09 |
| GO:0051239                 | regulation of multicellular organismal process | 7.03E-12 | 7.78E-09 |
| GO:0009653                 | anatomical structure morphogenesis             | 1.1E-11  | 1.0E-08  |

GO:0023052 signaling

4.25E-11 3.66E-08

---

**Table S2. Tissue/cell development-related GO Terms P<1.0E-04**

| <b>Developmental GO</b>    | <b>Gene set names</b>                              | <b>P</b> | <b>FDR q</b> |
|----------------------------|----------------------------------------------------|----------|--------------|
| <b>Fk induced genes</b>    | <b>( PTBFk &gt; PTB )</b>                          |          |              |
| GO:0007399                 | nervous system development                         | 4.12E-10 | 2.56E-07     |
| GO:0035295                 | tube development                                   | 2.46E-07 | 5.69E-05     |
| GO:1901342                 | regulation of vasculature development              | 3.42E-07 | 7.70E-05     |
| GO:0048514                 | blood vessel morphogenesis                         | 3.62E-07 | 7.90E-05     |
| GO:0001525                 | angiogenesis                                       | 5.80E-07 | 1.15E-04     |
| GO:0045765                 | regulation of angiogenesis                         | 8.33E-07 | 1.17E-04     |
| GO:0022414                 | reproductive process                               | 2.14E-06 | 3.29E-04     |
| GO:0000003                 | reproduction                                       | 2.17E-06 | 3.31E-04     |
| GO:0001568                 | blood vessel development                           | 2.85E-06 | 4.06E-04     |
| GO:0001655                 | urogenital system development                      | 2.98E-06 | 4.12E-04     |
| GO:0051960                 | regulation of nervous system development           | 4.03E-06 | 5.26E-04     |
| GO:0001944                 | vasculature development                            | 6.68E-06 | 8.04E-04     |
| GO:0022008                 | neurogenesis                                       | 6.72E-06 | 8.02E-04     |
| GO:0001501                 | skeletal system development                        | 7.19E-06 | 8.45E-04     |
| GO:0048699                 | generation of neurons                              | 1.05E-05 | 1.16E-03     |
| GO:0072358                 | cardiovascular system development                  | 1.29E-05 | 1.39E-03     |
| GO:0048608                 | reproductive structure development                 | 1.73E-05 | 1.81E-03     |
| GO:0061458                 | reproductive system development                    | 1.98E-05 | 2.02E-03     |
| GO:2000181                 | negative regulation of blood vessel morphogenesis  | 2.72E-05 | 2.58E-03     |
| GO:0072001                 | renal system development                           | 3.41E-05 | 3.10E-03     |
| GO:0001822                 | kidney development                                 | 3.81E-05 | 3.36E-03     |
| GO:1901343                 | negative regulation of vasculature development     | 4.86E-05 | 4.12E-03     |
| GO:0061448                 | connective tissue development                      | 5.54E-05 | 4.64E-03     |
| GO:0001657                 | ureteric bud development                           | 8.18E-05 | 6.58E-03     |
| GO:0051216                 | cartilage development                              | 8.56E-05 | 6.64E-03     |
| GO:0060429                 | epithelium development                             | 8.84E-05 | 6.72E-03     |
| GO:0072164                 | mesonephric tubule development                     | 9.00E-05 | 6.78E-03     |
| GO:0072163                 | mesonephric epithelium development                 | 9.00E-05 | 6.74E-03     |
| GO:0046546                 | development of primary male sexual characteristics | 9.10E-05 | 6.78E-03     |
| <b>Fk suppressed genes</b> | <b>( PTB &gt; PTBFk )</b>                          |          |              |
| GO:0048699                 | generation of neurons                              | 2.54E-09 | 1.31E-06     |
| GO:0022008                 | neurogenesis                                       | 1.51E-08 | 6.31E-06     |
| GO:0030182                 | neuron differentiation                             | 3.11E-08 | 1.18E-05     |
| GO:0001503                 | ossification                                       | 7.79E-08 | 2.42E-05     |

|            |                                                            |          |          |
|------------|------------------------------------------------------------|----------|----------|
| GO:0060537 | muscle tissue development                                  | 1.45E-07 | 4.24E-05 |
| GO:0007399 | nervous system development                                 | 2.01E-07 | 5.37E-05 |
| GO:0014706 | striated muscle tissue development                         | 2.16E-07 | 5.68E-05 |
| GO:0060429 | epithelium development                                     | 3.02E-07 | 7.31E-05 |
| GO:0072001 | renal system development                                   | 3.90E-07 | 8.77E-05 |
| GO:0007517 | muscle organ development                                   | 4.02E-07 | 8.78E-05 |
| GO:0072359 | circulatory system development                             | 5.47E-07 | 1.10E-04 |
| GO:0001501 | skeletal system development                                | 6.34E-07 | 1.24E-04 |
| GO:0001822 | kidney development                                         | 1.44E-06 | 2.56E-04 |
| GO:0030278 | regulation of ossification                                 | 1.76E-06 | 2.90E-04 |
| GO:0035239 | tube morphogenesis                                         | 1.98E-06 | 3.21E-04 |
| GO:0060562 | epithelial tube morphogenesis                              | 2.41E-06 | 3.81E-04 |
| GO:0001655 | urogenital system development                              | 2.84E-06 | 4.27E-04 |
| GO:0045664 | regulation of neuron differentiation                       | 4.50E-06 | 6.34E-04 |
| GO:0016202 | regulation of striated muscle tissue development           | 4.65E-06 | 6.44E-04 |
| GO:0061061 | muscle structure development                               | 4.99E-06 | 6.84E-04 |
| GO:1901861 | regulation of muscle tissue development                    | 5.54E-06 | 7.47E-04 |
| GO:0035295 | tube development                                           | 6.06E-06 | 7.90E-04 |
| GO:0048514 | blood vessel morphogenesis                                 | 6.14E-06 | 7.86E-04 |
| GO:0048634 | regulation of muscle organ development                     | 6.59E-06 | 8.30E-04 |
| GO:0051960 | regulation of nervous system development                   | 9.35E-06 | 1.08E-03 |
| GO:0003007 | heart morphogenesis                                        | 1.07E-05 | 1.21E-03 |
| GO:0045165 | cell fate commitment                                       | 1.20E-05 | 1.35E-03 |
| GO:0001649 | osteoblast differentiation                                 | 1.40E-05 | 1.51E-03 |
| GO:0031214 | biomineral tissue development                              | 1.81E-05 | 1.90E-03 |
| GO:0007507 | heart development                                          | 1.90E-05 | 1.97E-03 |
| GO:0050767 | regulation of neurogenesis                                 | 2.24E-05 | 2.23E-03 |
| GO:0001568 | blood vessel development                                   | 2.66E-05 | 2.58E-03 |
| GO:0048641 | regulation of skeletal muscle tissue development           | 3.00E-05 | 2.87E-03 |
| GO:0048666 | neuron development                                         | 3.48E-05 | 3.20E-03 |
| GO:0060348 | bone development                                           | 3.93E-05 | 3.48E-03 |
| GO:2000725 | regulation of cardiac muscle cell differentiation          | 4.48E-05 | 3.88E-03 |
| GO:0001525 | angiogenesis                                               | 4.48E-05 | 3.86E-03 |
| GO:0055024 | regulation of cardiac muscle tissue development            | 5.34E-05 | 4.38E-03 |
| GO:0048738 | cardiac muscle tissue development                          | 5.84E-05 | 4.74E-03 |
| GO:0001944 | vasculature development                                    | 7.16E-05 | 5.64E-03 |
| GO:2000726 | negative regulation of cardiac muscle cell differentiation | 8.15E-05 | 6.28E-03 |
| GO:0030509 | BMP signaling pathway                                      | 8.82E-05 | 6.71E-03 |

---

Table S3. Fk-induced gene list.

| <b>Skeletogenesis-related genes</b> | <b>PTB<br/>DESeq</b> | <b>PTBFk<br/>DESeq</b> | <b>fold<br/>induction by<br/>Fk <math>\geq 2.0</math></b> | <b>FDR adjusted<br/>P&lt;0.05</b> |
|-------------------------------------|----------------------|------------------------|-----------------------------------------------------------|-----------------------------------|
| <i>DLK1</i>                         | 15532.21             | 50776.97               | 3.27                                                      | 7.04E-09                          |
| <i>MMP2</i>                         | 7223.26              | 24243.16               | 3.36                                                      | 7.85E-08                          |
| <i>CILP2</i>                        | 9466.24              | 19658.75               | 2.08                                                      | 4.22E-05                          |
| <i>SFRP5</i>                        | 1947.04              | 6689.51                | 3.44                                                      | 4.86E-02                          |
| <i>SFRP1</i>                        | 1206.22              | 4896.12                | 4.06                                                      | 1.84E-07                          |
| <i>PBX3</i>                         | 2120.04              | 5234.18                | 2.47                                                      | 2.55E-16                          |
| <i>RUNX1</i>                        | 1278.92              | 3929.79                | 3.07                                                      | 7.03E-16                          |
| <i>PTN</i>                          | 697.46               | 2631.56                | 3.77                                                      | 5.87E-08                          |
| <i>TNFRSF11B</i>                    | 1198.53              | 2595.39                | 2.17                                                      | 7.90E-03                          |
| <i>SOX11</i>                        | 1244.26              | 2500.55                | 2.01                                                      | 6.39E-07                          |
| <i>SIX2</i>                         | 857.18               | 2380.29                | 2.78                                                      | 2.34E-10                          |
| <i>CITED2</i>                       | 879.18               | 2051.24                | 2.33                                                      | 3.60E-09                          |
| <i>GATA3</i>                        | 887.45               | 1870.27                | 2.11                                                      | 2.18E-03                          |
| <i>ALX4</i>                         | 648.05               | 1803.80                | 2.78                                                      | 2.77E-10                          |
| <i>EYA1</i>                         | 517.90               | 1625.08                | 3.14                                                      | 9.49E-15                          |
| <i>FAP</i>                          | 407.94               | 1371.01                | 3.36                                                      | 4.16E-02                          |
| <i>INHBA</i>                        | 370.15               | 1321.50                | 3.57                                                      | 4.34E-07                          |
| <i>ITGA4</i>                        | 765.55               | 2255.70                | 2.95                                                      | 5.45E-11                          |
| <i>GATA2</i>                        | 254.42               | 747.22                 | 2.94                                                      | 1.06E-03                          |
| <i>SOCS3</i>                        | 317.62               | 695.17                 | 2.19                                                      | 1.87E-02                          |
| <i>RSPO3</i>                        | 50.16                | 597.70                 | 11.94                                                     | 9.85E-23                          |
| <i>TGFBR3</i>                       | 56.25                | 377.66                 | 6.73                                                      | 1.03E-10                          |
| <i>RSPO2</i>                        | 59.30                | 202.07                 | 3.42                                                      | 1.24E-02                          |
| <i>LHX8</i>                         | 74.28                | 152.34                 | 2.04                                                      | 1.84E-02                          |
| <i>CSF3R</i>                        | 6.60                 | 77.04                  | 11.63                                                     | 8.39E-05                          |
| <i>UCMA</i>                         | 1.60                 | 68.10                  | 43.15                                                     | 1.03E-06                          |
| <i>LHX6</i>                         | 15.71                | 45.90                  | 2.90                                                      | 4.81E-02                          |
| <i>DACT2</i>                        | 1.83                 | 21.03                  | 11.19                                                     | 1.65E-03                          |
| <i>RARRES1</i>                      | 3.65                 | 15.40                  | 4.20                                                      | 2.71E-02                          |
| <i>DLL4</i>                         | 0.29                 | 8.27                   | 24.42                                                     | 2.23E-02                          |
| <b>BMP signaling genes</b>          | <b>PTB<br/>DESeq</b> | <b>PTBFk<br/>DESeq</b> | <b>fold<br/>induction by<br/>Fk <math>\geq 2.0</math></b> | <b>FDR adjusted<br/>P&lt;0.05</b> |
| <i>GREM1</i>                        | 1346.97              | 4501.42                | 3.34                                                      | 4.40E-08                          |
| <i>GDF5</i>                         | 69.95                | 159.11                 | 2.28                                                      | 5.66E-04                          |
| <i>BMP5</i>                         | 38.96                | 120.17                 | 3.09                                                      | 2.66E-02                          |
| <i>CHRDL2</i>                       | 11.44                | 83.24                  | 7.23                                                      | 3.41E-09                          |
| <i>BMPER</i>                        | 5.65                 | 32.00                  | 5.82                                                      | 2.57E-03                          |

| <b>Cell cycle control genes</b> | <b>PTB<br/>DESeq</b> | <b>PTBFk<br/>DESeq</b> | <b>fold<br/>induction by<br/>Fk <math>\geq 2.0</math></b> | <b>FDR adjusted<br/>P&lt;0.05</b> |
|---------------------------------|----------------------|------------------------|-----------------------------------------------------------|-----------------------------------|
| <i>CCNB1</i>                    | 336.49               | 690.73                 | 2.06                                                      | 1.64E-02                          |
| <i>CCNA2</i>                    | 236.81               | 592.52                 | 2.51                                                      | 1.00E-02                          |
| <i>CDK1</i>                     | 166.77               | 584.12                 | 3.51                                                      | 2.22E-02                          |
| <i>CDK18</i>                    | 144.72               | 465.27                 | 3.21                                                      | 2.62E-04                          |
| <i>CCNB2</i>                    | 113.80               | 287.64                 | 2.54                                                      | 7.50E-04                          |
| <i>E2F1</i>                     | 101.41               | 232.61                 | 2.30                                                      | 1.41E-03                          |
| <i>CCNE2</i>                    | 47.18                | 105.64                 | 2.23                                                      | 3.27E-03                          |
| <i>MYCN</i>                     | 26.06                | 95.27                  | 3.63                                                      | 8.36E-03                          |
| <i>CDC45</i>                    | 22.95                | 55.67                  | 2.45                                                      | 9.40E-03                          |
| <i>CDC25C</i>                   | 14.73                | 47.28                  | 3.24                                                      | 2.20E-02                          |
| <i>E2F8</i>                     | 11.04                | 41.65                  | 3.82                                                      | 6.59E-03                          |
| <i>CCNA1</i>                    | 4.44                 | 19.91                  | 4.50                                                      | 8.17E-03                          |
| <b>DNA replication genes</b>    | <b>PTB<br/>DESeq</b> | <b>PTBFk<br/>DESeq</b> | <b>fold<br/>induction by<br/>Fk <math>\geq 2.0</math></b> | <b>FDR adjusted<br/>P&lt;0.05</b> |
| <i>ORC6</i>                     | 94.27                | 190.00                 | 2.02                                                      | 2.50E-02                          |
| <i>MCM10</i>                    | 43.79                | 125.85                 | 2.88                                                      | 1.17E-02                          |
| <i>CDT1</i>                     | 46.94                | 109.89                 | 2.35                                                      | 5.77E-03                          |
| <i>ORC1</i>                     | 30.51                | 75.11                  | 2.47                                                      | 5.11E-03                          |



Table S4. Fk-suppressed gene list.

| Skeletogenesis-related genes | PTB<br>DESeq | PTBFk<br>DESeq | fold<br>suppression<br>by Fk $\geq 2.0$ | FDR adjusted<br>P<0.05 |
|------------------------------|--------------|----------------|-----------------------------------------|------------------------|
| <b>COL10A1</b>               | 759335.21    | 27191.44       | 27.93                                   | 1.42E-11               |
| <b>PTH1R</b>                 | 57556.05     | 20996.49       | 2.74                                    | 1.25E-07               |
| <b>CYTL1</b>                 | 20403.47     | 6378.10        | 3.20                                    | 4.21E-02               |
| <b>MEF2C</b>                 | 19516.42     | 8279.90        | 2.36                                    | 8.25E-05               |
| <b>IHH</b>                   | 16969.11     | 3656.91        | 4.64                                    | 1.10E-03               |
| <b>IBSP</b>                  | 16004.16     | 85.41          | 187.55                                  | 4.17E-09               |
| <b>IGF1R</b>                 | 13863.53     | 5317.81        | 2.61                                    | 1.57E-33               |
| <b>NRCAM</b>                 | 7953.61      | 1665.61        | 4.78                                    | 1.15E-03               |
| <b>GSK3B</b>                 | 6291.89      | 2568.07        | 2.45                                    | 1.92E-17               |
| <b>RUNX2</b>                 | 5022.87      | 1617.64        | 3.11                                    | 2.93E-06               |
| <b>ALPL</b>                  | 4578.90      | 152.96         | 29.96                                   | 5.13E-09               |
| <b>FST</b>                   | 4174.02      | 953.38         | 4.38                                    | 3.21E-03               |
| <b>SP7</b>                   | 3828.53      | 646.53         | 5.92                                    | 3.31E-10               |
| <b>FOXA2</b>                 | 3504.24      | 994.51         | 3.52                                    | 1.53E-11               |
| <b>IRX5</b>                  | 2042.96      | 310.43         | 6.59                                    | 1.03E-10               |
| <b>CD24</b>                  | 2006.71      | 213.78         | 9.40                                    | 3.49E-05               |
| <b>WNT5B</b>                 | 1648.18      | 610.88         | 2.70                                    | 3.62E-07               |
| <b>DKK1</b>                  | 1516.17      | 64.48          | 23.42                                   | 1.04E-07               |
| <b>WNT11</b>                 | 1479.72      | 363.90         | 4.06                                    | 5.93E-08               |
| <b>VDR</b>                   | 1478.11      | 428.00         | 3.45                                    | 6.62E-12               |
| <b>VAV3</b>                  | 1406.94      | 97.05          | 14.52                                   | 8.08E-07               |
| <b>DLX5</b>                  | 1256.06      | 593.71         | 2.12                                    | 1.29E-02               |
| <b>WNT16</b>                 | 1914.44      | 290.74         | 6.58                                    | 7.95E-03               |
| <b>IL17B</b>                 | 1070.22      | 43.11          | 24.66                                   | 4.55E-35               |
| <b>JAG2</b>                  | 896.56       | 430.89         | 2.08                                    | 1.49E-08               |
| <b>COL4A6</b>                | 759.47       | 116.31         | 6.55                                    | 2.48E-16               |
| <b>SPP1</b>                  | 755.78       | 21.22          | 35.38                                   | 6.60E-06               |
| <b>DACH1</b>                 | 529.83       | 41.79          | 12.84                                   | 9.47E-15               |
| <b>AXIN2</b>                 | 328.09       | 154.90         | 2.12                                    | 1.15E-03               |
| <b>DLL1</b>                  | 310.31       | 45.14          | 6.94                                    | 2.20E-09               |
| <b>KL</b>                    | 191.59       | 62.53          | 3.05                                    | 1.18E-05               |
| <b>MEPE</b>                  | 187.06       | 1.02           | 186.09                                  | 9.20E-16               |
| <b>CUX2</b>                  | 175.05       | 0.79           | 232.46                                  | 2.60E-16               |
| <b>ANK1</b>                  | 141.71       | 8.88           | 16.55                                   | 7.71E-12               |
| <b>WNT10B</b>                | 138.31       | 22.82          | 6.05                                    | 2.43E-09               |
| <b>DLX3</b>                  | 93.87        | 26.88          | 3.55                                    | 1.15E-04               |
| <b>DKK2</b>                  | 63.92        | 7.89           | 7.96                                    | 1.58E-02               |
| <b>DMP1</b>                  | 46.19        | 9.41           | 4.77                                    | 2.58E-02               |

|                                 |                      |                        |                                                             |                                   |
|---------------------------------|----------------------|------------------------|-------------------------------------------------------------|-----------------------------------|
| <i>MYOCD</i>                    | 28.52                | 3.55                   | 8.39                                                        | 9.44E-04                          |
| <i>CYSLTR1</i>                  | 24.29                | 0.00                   | 127.12                                                      | 4.72E-06                          |
| <i>DCX</i>                      | 16.86                | 3.81                   | 4.30                                                        | 1.86E-02                          |
| <i>CALCRL</i>                   | 13.48                | 0.75                   | 17.85                                                       | 2.52E-03                          |
| <b>BMP signaling genes</b>      | <b>PTB<br/>DESeq</b> | <b>PTBFk<br/>DESeq</b> | <b>fold<br/>suppression<br/>by Fk <math>\geq 2.0</math></b> | <b>FDR adjusted<br/>P&lt;0.05</b> |
| <i>DCN</i>                      | 27128.19             | 13080.70               | 2.07                                                        | 2.15E-02                          |
| <i>SMPD3</i>                    | 5685.56              | 308.89                 | 18.41                                                       | 1.22E-06                          |
| <i>ID2</i>                      | 2699.09              | 1246.36                | 2.16                                                        | 5.73E-07                          |
| <i>BMP2</i>                     | 2153.56              | 540.41                 | 3.99                                                        | 6.72E-11                          |
| <i>CHRDL1</i>                   | 411.70               | 189.02                 | 2.18                                                        | 9.14E-11                          |
| <i>BMP8A</i>                    | 254.56               | 105.41                 | 2.43                                                        | 5.90E-04                          |
| <i>BMP8B</i>                    | 34.98                | 10.06                  | 3.51                                                        | 1.98E-02                          |
| <b>Cell cycle control genes</b> | <b>PTB<br/>DESeq</b> | <b>PTBFk<br/>DESeq</b> | <b>fold<br/>suppression<br/>by Fk <math>\geq 2.0</math></b> | <b>FDR adjusted<br/>P&lt;0.05</b> |
| <i>CDKN1A</i>                   | 8873.45              | 3582.71                | 2.48                                                        | 1.50E-16                          |
| <i>CDC42EP3</i>                 | 3631.13              | 1647.02                | 2.21                                                        | 1.93E-05                          |
| <i>MYCL</i>                     | 34.37                | 11.45                  | 2.95                                                        | 1.15E-02                          |
| <b>DNA replication genes</b>    | <b>PTB<br/>DESeq</b> | <b>PTBFk<br/>DESeq</b> | <b>fold<br/>suppression<br/>by Fk <math>\geq 2.0</math></b> | <b>FDR adjusted<br/>P&lt;0.05</b> |
|                                 |                      |                        |                                                             |                                   |

**Table S5. Comparative bioinformatics analysis between Fk-induced genes with Wu, et al.'s human embryonic chondrocytes.**

| Fk-induced<br>(fold induction<br>≥2.0) genes | 17w articular<br>chondrocytes | 6w<br>condensing<br>chondrocytes | 17w > 6w<br>(fold<br>increase<br>>1.75) |
|----------------------------------------------|-------------------------------|----------------------------------|-----------------------------------------|
|                                              | Microarray unit               | Microarray unit                  |                                         |
| <i>ST6GALNAC3</i>                            | 9.51                          | 4.05                             | 2.34                                    |
| <i>LIX1</i>                                  | 18.04                         | 9.49                             | 1.90                                    |
| <i>MXRA5</i>                                 | 11.42                         | 6.12                             | 1.87                                    |
| <i>CENPK</i>                                 | 8.70                          | 4.70                             | 1.85                                    |
| <i>KIT</i>                                   | 7.51                          | 4.09                             | 1.84                                    |
| <i>JAKMIP2</i>                               | 13.90                         | 7.66                             | 1.81                                    |
| <i>BAI3</i>                                  | 12.07                         | 6.87                             | 1.76                                    |

| Fk-induced<br>(fold induction<br>≥2.0) genes | 17w articular<br>chondrocytes | 6w<br>condensing<br>chondrocytes | 17w < 6w<br>(fold<br>increase<br>>1.75) |
|----------------------------------------------|-------------------------------|----------------------------------|-----------------------------------------|
|                                              | Microarray unit               | Microarray unit                  |                                         |
| <i>CHI3L2</i>                                | 4.97                          | 11.54                            | 2.32                                    |
| <i>ICAM1</i>                                 | 16.76                         | 38.67                            | 2.31                                    |
| <i>SERPINA3</i>                              | 5.28                          | 12.02                            | 2.28                                    |
| <i>ITIH6</i>                                 | 4.25                          | 9.19                             | 2.16                                    |
| <i>BHLHE40</i>                               | 10.85                         | 23.16                            | 2.14                                    |
| <i>C1S</i>                                   | 9.30                          | 19.58                            | 2.11                                    |
| <i>NNMT</i>                                  | 4.67                          | 9.74                             | 2.08                                    |
| <i>GPRC5A</i>                                | 15.35                         | 31.18                            | 2.03                                    |
| <i>TRAF1</i>                                 | 9.15                          | 18.47                            | 2.02                                    |
| <i>TNFRSF11B</i>                             | 11.07                         | 21.75                            | 1.96                                    |
| <i>PLA2G2A</i>                               | 6.35                          | 11.88                            | 1.87                                    |
| <i>ATP6V0A4</i>                              | 5.74                          | 10.58                            | 1.84                                    |
| <i>OSMR</i>                                  | 17.59                         | 31.94                            | 1.82                                    |
| <i>INSC</i>                                  | 4.31                          | 7.61                             | 1.77                                    |
| <i>CST1</i>                                  | 4.07                          | 7.14                             | 1.76                                    |

**Table S6. Comparative bioinformatics analysis between Fk-suppressed genes with Wu, et al.'s human embryonic chondrocytes.**

| Fk-suppressed<br>(fold reduction<br>≥2.0) genes | 17w articular<br>chondrocytes | 6w<br>condensing<br>chondrocytes | 17w > 6w<br>(fold<br>increase<br>>1.75) |
|-------------------------------------------------|-------------------------------|----------------------------------|-----------------------------------------|
|                                                 | Microarray unit               | Microarray unit                  |                                         |
| <i>DKK1</i>                                     | 8.76                          | 3.55                             | 2.47                                    |
| <i>DACH1</i>                                    | 23.78                         | 10.05                            | 2.37                                    |
| <i>CDH10</i>                                    | 7.35                          | 3.24                             | 2.27                                    |
| <i>DCX</i>                                      | 18.47                         | 9.52                             | 1.94                                    |
| <i>FGF13</i>                                    | 10.04                         | 5.67                             | 1.77                                    |
| <i>GPR64</i>                                    | 9.31                          | 5.32                             | 1.75                                    |

*DKK1* and *DCX* are articular cartilage genes.  
Forskolin suppresses the expression of these articular cartilage genes.

| Fk-suppressed<br>(fold reduction<br>≥2.0) genes | 17w articular<br>chondrocytes | 6w<br>condensing<br>chondrocytes | 17w < 6w<br>(fold<br>increase<br>>1.75) |
|-------------------------------------------------|-------------------------------|----------------------------------|-----------------------------------------|
|                                                 | Microarray unit               | Microarray unit                  |                                         |
| <i>AGT</i>                                      | 3.15                          | 13.09                            | 4.15                                    |
| <i>ISG20</i>                                    | 9.61                          | 25.49                            | 2.65                                    |
| <i>AOC3</i>                                     | 3.57                          | 7.21                             | 2.02                                    |
| <i>SLC28A3</i>                                  | 7.26                          | 14.12                            | 1.95                                    |
| <i>PPP4R4</i>                                   | 11.89                         | 21.47                            | 1.81                                    |
| <i>LOC100126784</i>                             | 13.15                         | 23.57                            | 1.79                                    |

Table S7. n (independent experiment number) and *P*-value lists.

| Gene           | <i>P</i> ,<br>n | <i>P</i> and n values for each condition |               |                 |
|----------------|-----------------|------------------------------------------|---------------|-----------------|
| Fig. 2B        |                 | PTBFk/PTB                                | PTGFk/PTG     | PT7Fk/PT7       |
| <i>COL2A1</i>  | <i>P</i><br>n   | 0.10<br>10                               | 0.28<br>8     | 0.17<br>6       |
| <i>COL10A1</i> | <i>P</i><br>n   | 5.4E-21<br>17                            | 1.1E-08<br>11 | 4.1E-10<br>9    |
| <i>COL1A1</i>  | <i>P</i><br>n   | 2.5E-03<br>7                             | 1.7E-04<br>7  | 6.3E-03<br>6    |
| <i>ALPL</i>    | <i>P</i><br>n   | 8.6E-04<br>6                             | 0.016<br>3    | 0.57<br>3       |
| <i>SOX9</i>    | <i>P</i><br>n   | 0.32<br>9                                | 0.26<br>3     | 0.20<br>3       |
| <i>RUNX2</i>   | <i>P</i><br>n   | 1.9E-06<br>10                            | 0.0097<br>3   | 0.14<br>3       |
| <i>BMP4</i>    | <i>P</i><br>n   | 0.0081<br>3                              | 0.0017<br>3   | 1.0E-04<br>3    |
| <i>MMP13</i>   | <i>P</i><br>n   | 0.12<br>3                                | 0.68<br>3     | 0.63<br>3       |
| Fig. 3B Left   |                 | +cAMP/-cAMP                              | +Fk/-Fk       | +IBMX/-IBMX     |
| <i>COL2A1</i>  | <i>P</i><br>n   | 0.35<br>8                                | 0.037<br>10   | 0.30<br>8       |
| <i>COL10A1</i> | <i>P</i><br>n   | 9.3E-06<br>6                             | 7.9E-09<br>8  | 4.2E-05<br>8    |
| Fig. 3B Right  |                 | +Fk/-Fk                                  | +C59/-C59     | +Fk+C59/-Fk-C59 |
| <i>COL2A1</i>  | <i>P</i><br>n   | 0.28<br>5                                | 0.36<br>6     | 0.35<br>6       |

**COL10A1**

*P*  
n

5.9E-06

0.0077

1.8E-06

5

6

6

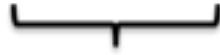

0.0031

*P*

### **3. SUPPLEMENTAL EXPERIMENTAL PROCEDURES**

#### **Human pluripotent stem cell culture.**

H9 hESCs were maintained on mouse embryonic fibroblast feeder cells in SR medium: Dulbecco's modified Eagle's medium (DMEM): Ham's F12 (1:1), 20% (v/v) KnockOut Serum Replacement (KSR), 2 mM GlutaMAX, 0.1 mM non-essential amino acids (all from Invitrogen, Carlsbad, CA) and 90  $\mu$ M  $\beta$ -mercaptoethanol (Sigma-Aldrich, St. Louis, MO), supplemented with 4 ng/ml FGF2 (hFGF2-IS, Miltenyi Biotec, Bergisch Gladbach, Germany) as described (Umeda et al., 2012), Alternatively CY2-SOX9-2A-ZsGreen-2A-Puro (SOX9-GFP) hiPSCs derived from the former Center for Regenerative Medicine in NIH were maintained in Essential-8 medium on a vitronectin-coated plate (Invitrogen). Media and supplements, buffers and specialized tissue culture plates were generally sourced as described (Umeda et al., 2015; Umeda et al., 2012; Wang and Nakayama, 2009; Wang et al., 2010).

#### **Generation and expansion of ectomesenchymal cells from hPSCs through neural crest specification.**

Human PSCs were treated with collagenase I (Worthington, Lakewood, NJ) to generate clumps, which were plated onto a low-adhesion dish (Sarstedt, Nümbrecht, Germany) and cultured for 1 day in a chemically defined medium (CDM): Iscove's modified Dulbecco's Medium (IMDM) (Sigma): Ham's F12 (Invitrogen) (1:1), 0.5% (w/v) bovine serum albumin (Sigma), 1% (v/v) synthetic lipid concentrate (Invitrogen), 100  $\mu$ g/ml human holo-transferrin (Sigma), 20  $\mu$ g/ml human insulin (Sigma), 0.17 mM ascorbic acid-2-phosphate (AA2P, Sigma), 2 mM GlutaMAX (Invitrogen), and 0.4 mM monothioglycerol (MTG, Sigma), supplemented with 10  $\mu$ M SB431542 (Tocris) and 5  $\mu$ M Y27632 (ROCK inhibitor, Tocris, Ellisville MO) at 37°C under 5% CO<sub>2</sub>/5% O<sub>2</sub>. The embryoid bodies (EBs) formed were transferred to a plate coated with 0.1% (w/v) porcine gelatin (Sigma) on day 1 and cultured in CDM with 10  $\mu$ M SB431542 and 2  $\mu$ M CHIR99021 (Tocris) till day 5. Then media was changed to CDM with 10  $\mu$ M SB431542 only. On the day of

harvest (usually day 6), a suspension of single cells was prepared using TrypLE Select (Invitrogen), diluted 2.5-fold with 0.5 mM EDTA in D-PBS (without  $\text{Ca}^{2+}$  and  $\text{Mg}^{2+}$ ), immunostained with the AlexaFluor647-conjugated mouse anti-hCD271 (#560326, BD Biosciences, San Jose, CA) and phycoerythrin (PE)-conjugated mouse anti-hCD73 (#344004, BioLegend, San Diego, CA) monoclonal antibodies, and the  $\text{CD271}^{\text{hi}}\text{CD73}^{\text{-}}$  cell population was isolated by FACS as described (Umeda et al., 2015). Alternatively, the  $\text{CD271}^{\text{hi}}$  cell population was isolated by magnetic cell sorting using the MACS cell separation system and CD271 microbead kits (#130-092-283, Miltenyi Biotec). The sorted cells were transferred to a plate coated with 10  $\mu\text{g}/\text{ml}$  human fibronectin (Sigma) and cultured overnight at  $4^{\circ}\text{C}$  in CDM supplemented with 2  $\mu\text{g}/\text{ml}$  heparin (Sigma), 2.5  $\mu\text{g}/\text{ml}$  catalase (Sigma), 5-10 ng/ml FGF2 and 5-7.5  $\mu\text{M}$  SB431542 (FSb medium), at  $37^{\circ}\text{C}$  under 5%  $\text{CO}_2/5\%$   $\text{O}_2$ . The cells were passaged every 2-3 days at  $3\text{-}4 \times 10^4$  cells/ $\text{cm}^2$  using the diluted TrypLE Select as described (Umeda et al., 2015). At the desired density, the ectomesenchymal cells were primed with CDM supplemented with 5 ng/ml FGF2 and 10 ng/ml TGF $\beta$ 3 (hTGF $\beta$ 3, R&D Systems, Minneapolis, MN) for 3 days prior to chondrogenesis induction, and harvested with TrypLE Select.

#### **Generation and isolation of paraxial mesoderm from hPSCs.**

Human PSCs were differentiated 3-dimensionally using the CDM-based EB-forming culture as described (Umeda et al., 2015; Umeda et al., 2012) with slight modifications. Briefly, the EB culture was initiated in the CDM with extra anti-oxidants: 2.5  $\mu\text{g}/\text{ml}$  catalase, 1.5  $\mu\text{g}/\text{ml}$  reduced glutathione (Sigma) and 5 mM proline (Sigma) (CDM-AO medium), supplemented with 5  $\mu\text{M}$  Y27632, 5 ng/ml BMP4 (hBMP4, R&D), and 5  $\mu\text{M}$  CHIR99021, and maintained at  $37^{\circ}\text{C}$  under 5%  $\text{CO}_2/5\%$   $\text{O}_2$ . On day 1, medium was changed to CDM-AO containing 5  $\mu\text{M}$  CHIR99021. On day 2, 100-500 ng/ml Noggin (mNoggin-Fc, R&D) was added. On day 3, EBs were transferred to CDM-AO containing 0.9% (w/v) methylcellulose (Methocel A4M, Dow Chemical, Midland, MI) with 100 ng/ml Noggin, 0.5-2  $\mu\text{M}$  CHIR99021, 0.2  $\mu\text{M}$  PD173074 (FGFR1 inhibitor, Tocris), 3



$\mu\text{M}$  SB431542 and 5 ng/ml PDGF (hPDGF-BB, R&D). On day 6 or 7, single EB cells were obtained by treatment of EBs with the diluted TrypLE Select for 3-5 min at 37°C. The cells were stained with mouse anti-hPDGFR $\alpha$  (IgG<sub>2a</sub>, #556001, BD) and anti-KDR (IgG<sub>1</sub>, #101-M20 ReliaTech, Wolfenbüttel, Germany) monoclonal antibodies, then with biotin-conjugated goat anti-mouse IgG<sub>2a</sub> (#1080-08), and PE-conjugated goat anti-mouse IgG<sub>1</sub> antibodies (#1070-01) from SouthernBiotech (Birmingham, AL), and finally with allophycocyanin (APC)-conjugated streptavidin (#554067, BD). The KDR<sup>+</sup>PDGFR $\alpha$ <sup>+</sup> cell population was isolated by FACS as described (Umeda et al., 2012).

#### **Expansion of hPSC-derived paraxial mesoderm cells.**

The FACS-isolated cells were cultured on a fibronectin coated plate in CDM supplemented with 2  $\mu\text{g}/\text{ml}$  heparin, 2.5  $\mu\text{g}/\text{ml}$  catalase, 5-10 ng/ml FGF2, 5-10 ng/ml PDGF, 5-7.5  $\mu\text{M}$  SB431542 and 2  $\mu\text{M}$  CHIR99021 (FPSbC medium), at 37°C under 5% CO<sub>2</sub>/5% O<sub>2</sub> and passaged every 2-3 days at  $3.0 \times 10^4$  cells/cm<sup>2</sup> using the diluted TrypLE Select. At passage 2, the medium composition was changed to FSbC by removal of PDGF from the FPSbC medium.

#### **Expansion of human adult nasal chondrocytes.**

Human adult nasal chondrocytes from one female (11F) and two male patients (12M, 13M) were independently isolated as described (Centola et al., 2013). Expansion of the chondrocytes was performed in DMEM (high glucose), 0.1 mM non-essential amino acids, 1 mM sodium pyruvate, 25 mM HEPES buffer, 2 mM GlutaMAX (all from Invitrogen) supplemented with 5% (v/v) fetal bovine serum (FBS, Hyclone, Logan, UT), 5 ng/ml FGF2 and 1 ng/ml hTGF $\beta$ 1 (R&D), at 37°C under 5% CO<sub>2</sub> for up to passage 3.

#### **Scaffold-free cartilage formation: pellet culture.**

To induce chondrogenesis from hPSC-derived chondroprogenitors, aliquots of  $2-3 \times 10^5$  cells were centrifuged in a 15-ml conical tube (BD) to form pellets, and cultured in a 0.5 ml of serum-free chondrogenic media: DMEM (high glucose), 1 mM sodium pyruvate, 1% (v/v) ITS+ (BD),

100 nM dexamethasone (Sigma), 0.17 mM AA2P, 0.35 mM proline, 2 mM GlutaMAX, and 50  $\mu$ M MTG, supplemented with 40 ng/ml PDGF. On day 6 of pellet culture, 10 ng/ml TGF $\beta$ 3 was added, and on day 10, a BMP (hBMP4 [PTB condition], hGDF5 [PTG condition], or hBMP7 [PT7 condition], all from R&D) was added at 50 ng/ml. For the dedifferentiated human nasal chondrocytes, chondrogenesis was initiated in the presence of 10 ng/ml TGF $\beta$ 3 from day 0 as described (Peltari et al., 2014). In some pellets, 50 ng/ml BMP4 was added on day 10. When necessary the following were added on day 11 or 12: the activator of adenylyl cyclase, forskolin, 3-30  $\mu$ M (Tocris); canonical WNT signaling inhibitors such as KY02111, 10  $\mu$ M, (Tocris) (Minami et al., 2012), and  $\beta$ -catenin-TCF interaction inhibitor (Gonsalves et al., 2011), iCRT14, 25  $\mu$ M, (Tocris); general WNT signaling inhibitors such as the L-type calcium channel blocker that induces soluble WNT binding proteins (Takamatsu et al., 2014), verapamil, 50  $\mu$ M, (Tocris), and a porcupine inhibitor that inhibits WNT secretion (Proffitt et al., 2013), Wnt-C59, 30-120 nM, (Cellagen Technology, San Diego, CA); and cGMP signaling inhibitors such as the cGMP-dependent protein kinase inhibitor that works at least *in vitro* (Burkhardt et al., 2000), KT5824, 4  $\mu$ M, (Tocris) and a potent cGMP antagonist (Poppe et al., 2008), Rp-8-Br-PET-cGMPS, 30-60  $\mu$ M, (Tocris). In separate experiments, the following were added on day 11 or 12: cAMP analogs such as the PKA activator, *N*<sup>6</sup>-benzoyl-cAMP, 40-100  $\mu$ M, (Tocris and EMD Millipore, Temecula, CA): an EPAC activator (Christensen et al., 2003; Poppe et al., 2008), 8-pCPT-2'-O-Me-cAMP-AM, 3-6  $\mu$ M, (Tocris and Axxora, Farmingdale, NY); the non-specific phosphodiesterase inhibitor IBMX, 0.5 mM, (Tocris), and non/less-active version of forskolin, 1,9-dideoxyforskolin, 12.5-25  $\mu$ M, (Tocris). The concentrations used were in a published range that had been successful for various cell-based assays. The pellet cultures were maintained at 37°C under 7.5% CO<sub>2</sub> for up to 40 days. When the cartilage pellet became large enough to fill the bottom of the conical tube (larger than 4 mm in diameter), the pellet was transferred to a well of a 24-well tissue culture-untreated plate (BD), and cultured in 1.0-1.5 ml of chondrogenic medium at 37°C

under 7.5% CO<sub>2</sub>/5% O<sub>2</sub>. Some cartilage pellets were then fixed with Zinc-Formalin (Z-Fix, American MasterTech, Lodi, CA) for 1 day, paraffin-embedded, sectioned (5 μm), deparaffinized, rehydrated, and stained with 0.1% (w/v) Toluidine Blue (Sigma).

#### **Isolation of chondrocytes from cartilage pellets.**

A cartilage pellet was treated with 0.3-0.5 ml of 4 mg/ml collagenase (D [Roche/Sigma]: XI [Sigma]=1:1 in DMEM) (Nakayama et al., 2000) at 37°C for 3 h with occasional shaking. Enzyme digestion was stopped by the addition of 1 ml DMEM, 10% (v/v) FBS. Pellets were dissociated with repetitive pipetting, and remaining aggregates were removed with a 40 μm mesh (BD). Cells were washed twice with an appropriate medium or solution. Approximately 1.5-5.0 x 10<sup>5</sup> cells were recovered per pellet.

#### **EdU labeling of chondrocytes in cartilage pellets.**

Ten to 20 μM of EdU (Click-iT Plus EdU AlexaFluor 647 Flow Cytometry Assay Kit, Invitrogen) was added to pellet cultures and maintained for 21-25 h. The labeling time was determined by test labeling of pellets for 3 h, 21 h, 3 days, and 7 days. Under PTB+/-Fk conditions, approximately 1 day of labeling gave the most reliable values of EdU<sup>+</sup> cell population from H9 hESC- and CY2 SOX9-GFP hiPSC-progeny-derived cartilage. Two to three cartilage pellets were combined, and single cells were isolated as described above. Cells were washed with PBS and subjected to brief fixation with para-formaldehyde, followed by permeabilization with saponin, and then to AlexaFluor 647-picolyl azide treatment, according to the manufacturer's recommendation. The labeled cells were analyzed by FACS LSRII (BD).

#### **Isolation and quantification of DNA, RNA and sGAG from cartilage.**

Cartilage pellets were collected and submerged in liquid N<sub>2</sub>, manually cracked into small pieces with a liquid N<sub>2</sub> cooled mortar and a pellet pestle, and homogenized in the lysis buffer (RLT, Qiagen, Valencia, CA). The cleared lysates were then subjected to DNA, RNA and proteins isolation using the AllPrep DNA/RNA/Protein mini kit (Qiagen). The purified RNA was used for

real-time RT-PCR analysis. The isolated proteins were subjected to papain digestion for 20-24 h at 60°C (125 µg/ml papain, 10 mM cysteine in sodium phosphate-EDTA pH 6.5 [all from Sigma]), and released sGAG was quantified by the 1,9-dimethyl methylene blue (DMMB [Sigma], 16 µg/ml in glycine-NaCl pH 3) serial-dilution assay, using bovine tracheal chondroitin-4-sulfate (Biocolor, UK) as standard. The OD<sub>590-530</sub> was measured with SpectraMax M2 (Molecular Devices, Sunnyvale, CA). The DNA isolated with the AllPrep kit was quantified by the Hoechst33258 (Sigma, 0.2 µg/ml in Tris-HCl-EDTA-NaCl pH 7.5) serial-dilution assay, using bovine thymus DNA (Sigma) as standard. The fluorescence (emission 460 nm, excitation 360 nm) was measured with SpectraMax M2. The total sGAG and DNA amounts per particle, along with comparative ratios of the sGAG and DNA, were then calculated. Results are presented as mean values with SEM (the standard error of the mean) shown by thin error lines.

#### **Gene expression profiling.**

The isolated RNA was reverse transcribed (RT) using a Superscript III kit (Invitrogen) and real-time polymerase chain reaction (RT-PCR) was performed using the Taqman Gene Expression Assay and ABI7900 (Applied Biosystems, Foster City, CA). The expression levels of individual genes from duplicate or triplicate reactions were normalized against *EEF1A1* transcript ( $2^{-\Delta Ct} \times 100$ ) and averaged to obtain relative expression, as described (Wang and Nakayama, 2009). The RT-PCR results are presented as mean relative expression levels with SEM shown by the thin error lines. Undetectable levels of all the genes tested lie in the relative expression range of 0.001 to 0.0001. The “% *COL10A1/COL2A1*” is a relative expression of *COL10A1* normalized against that of *COL2A1* and multiplied by 100. The “Change in expression” was determined by the ratio of gene expression levels between treated (+) and untreated (-) pellets.

For RNA Sequencing analysis (RNA-seq), three independent sets of PTB pellets, and four independent sets of PTBFk pellets were prepared from passage 5-8 ectomesenchymal cells (i.e., FSb-expanded CD271<sup>hi</sup>CD73<sup>-</sup> neural crest-like progeny of H9 hESCs). On day 26-28

of pellet culture, 5 to 6 cartilage pellets were harvested, combined and total RNA was extracted with an RNeasy mini kit (Qiagen). Poly (A)-tailed messenger RNA was enriched using Poly(A)Purist Kit (Ambion, Foster City, CA) before the preparation of the RNA-seq library using an Ultra directional RNA library prep kit for Illumina (New England Biolabs, Ipswich, MA) per manufacturer's instructions. RNA-seq was performed using the Illumina Nextseq500 with the 150 bp pair-ended running mode. Sequencing reads were aligned against the GRCh37/hg19 reference genome using bowtie2 (Langmead and Salzberg, 2012) with default parameter. Only uniquely mapped reads were used for downstream analysis. HTseq was used to count the read numbers mapped to each gene. DESeq2 (Love et al., 2014) was used to call the significantly differentially expressed genes (fold change  $\geq 2$ ; false discovery rate  $\leq 0.05$ ) between two conditions. The normalized gene counts from DESeq2 was used to do the normalization. The analyzed data are summarized in Tables S1-4. Sequenced reads were deposited to GEO (Accession #: GSE116173).

### **Subcutaneous transplantation of cartilage particles.**

In preparation for cartilage transplantation, 6-12-week-old female immunocompromized NSG mice (NOD.Cg-*Prkdc*<sup>scid</sup> *Il2rg*<sup>tm1Wjl</sup>/SzJ; Stock No: 005557) were anesthetized with isoflurane. After they had lost the pedal withdrawal reflex, buprenorphine was injected subcutaneously near the proposed site of incision, followed by clipping of back hair, skin disinfection with chlorhexidine and 70% (v/v) alcohol, and placement of a sterile drape around the area of incision. Mice were placed on a heated pad during the procedure to preserve body temperature. Two mid-longitudinal skin incisions of approximately 1 cm were made on the dorsal neck area of each mouse, and subcutaneous pockets formed by blunt dissection. *In vitro*-made cartilage pellets (of approximately 1-5 mm "wet" diameter) were individually placed into each pocket, with up to two transplants per mouse. Incisions were closed with skin adhesive. After 8 weeks, the transplanted mice were euthanized and cartilage pellets were harvested, fixed with Z-Fix for 4 days, embedded in plastic, sectioned (5  $\mu\text{m}$ ), deplastified, rehydrated and stained with von

Kossa counterstained with van Gieson, or with Toluidine Blue. Control experiments were performed using a piece of articular cartilage surface of 2-year-old bovine knee (4 mm in diameter x 2-3 mm in depth) obtained from Animal Technologies (Tyler, TX). The transplantation experiments were performed under the regulation of IACUC for the University of Texas Health Science Center at Houston (UTHealth).

### **Immunohistological staining.**

The *in vitro*-made cartilage pellets were fixed with Z-Fix for 1 day, and paraffin embedded, sectioned (5  $\mu$ m), deparaffinized with xylene, rehydrated, heat treated in the antigen-retrieval solution (Dako, Glostrup, Denmark), blocked with the blocking buffer (Dako), and subjected to immunofluorescence detection of COL1 (for detecting mesenchymal cells or osteoblasts), COL2 (for detecting chondrocytes), or Ki67 (for detecting proliferating cells). The sections of *in vivo*-derived, plastic-embedded cartilage pellets were deplastified in 1-acetoxy-2-methoxyethane (Sigma) for 30 min, rehydrated, DeCal (BioGenex Lab, Fremont, CA) and heat treated, blocked, and subjected to immunofluorescence detection of COL2 or COL10 (for detecting hypertrophic chondrocytes). Primary antibodies were rabbit anti-COL1 antibody (#NB600-408) and biotinylated goat anti-COL2 antibody (#NBP1-26546) from Novus Biologicals (Littleton, CO), and rabbit anti-human Ki67 antibody (#AB66155) and rabbit anti-COL10 antibody (#AB58632) from Abcam (Cambridge, MA). Secondary reagents were goat anti-rabbit IgG-AlexaFluor488 (#A11034) and streptavidin-AlexaFluor594 (#S11227) from Molecular Probes (Eugene, OR). The slides were washed in PBS and mounted with ProLong Gold anti-fade mounting media (Molecular Probes). The % Ki67<sup>+</sup> nuclei/DAPI<sup>+</sup> nuclei of the COL2<sup>+</sup> area was calculated as the average ratio between the number of Ki67<sup>+</sup> nuclei and that of (DAPI<sup>+</sup>) nuclei counted from 3-4 different COL2<sup>+</sup> areas per section and multiplied by 100.

### **Flow Cytometry.**

FACS analysis was performed on LSR II (BD). Cell sorting was done with FACS Aria II (BD) as described (Umeda et al., 2015; Umeda et al., 2012). Viable single cells were gated using DAPI (Sigma). Sorted cells ranged in purity from 90 to 95%.

### **Statistical Analysis.**

Statistical differences between groups were determined by Student's t-test (2 categories) or 1-way ANOVA (>2 categories) followed by the Student-Newman-Keuls multiple comparisons by KaleidaGraph (Synergy, Reading, PA) software. n = number of independent experiments.

\*:  $P < 0.1$ , \*\*:  $P < 0.05$ , \*\*\*:  $P < 0.01$ .  $P < 0.05$  is considered to be statistically significant, and  $P < 0.1$  is weakly significant.

#### 4. SUPPLEMENTAL REFERENCES

- Burkhardt, M., Glazova, M., Gambaryan, S., Vollkommer, T., Butt, E., Bader, B., Heermeier, K., Lincoln, T.M., Walter, U., and Palmetshofer, A. (2000). KT5823 inhibits cGMP-dependent protein kinase activity in vitro but not in intact human platelets and rat mesangial cells. *J Biol Chem* 275, 33536-33541.
- Centola, M., Abbruzzese, F., Scotti, C., Barbero, A., Vadala, G., Denaro, V., Martin, I., Trombetta, M., Rainer, A., and Marsano, A. (2013). Scaffold-based delivery of a clinically relevant anti-angiogenic drug promotes the formation of in vivo stable cartilage. *Tissue Eng Part A* 19, 1960-1971.
- Christensen, A.E., Selheim, F., de Rooij, J., Dremier, S., Schwede, F., Dao, K.K., Martinez, A., Maenhaut, C., Bos, J.L., Genieser, H.G., *et al.* (2003). cAMP analog mapping of Epac1 and cAMP kinase. Discriminating analogs demonstrate that Epac and cAMP kinase act synergistically to promote PC-12 cell neurite extension. *J Biol Chem* 278, 35394-35402.
- Gonsalves, F.C., Klein, K., Carson, B.B., Katz, S., Ekas, L.A., Evans, S., Nagourney, R., Cardozo, T., Brown, A.M., and DasGupta, R. (2011). An RNAi-based chemical genetic screen identifies three small-molecule inhibitors of the Wnt/wingless signaling pathway. *Proc Natl Acad Sci U S A* 108, 5954-5963.
- Langmead, B., and Salzberg, S.L. (2012). Fast gapped-read alignment with Bowtie 2. *Nat Methods* 9, 357-359.
- Love, M.I., Huber, W., and Anders, S. (2014). Moderated estimation of fold change and dispersion for RNA-seq data with DESeq2. *Genome Biol* 15, 550.
- Minami, I., Yamada, K., Otsuji, T.G., Yamamoto, T., Shen, Y., Otsuka, S., Kadota, S., Morone, N., Barve, M., Asai, Y., *et al.* (2012). A small molecule that promotes cardiac differentiation of human pluripotent stem cells under defined, cytokine- and xeno-free conditions. *Cell Rep* 2, 1448-1460.



- Nakayama, N., Lee, J., and Chiu, L. (2000). Vascular endothelial growth factor synergistically enhances bone morphogenetic protein-4-dependent lymphohematopoietic cell generation from embryonic stem cells in vitro. *Blood* 95, 2275-2283.
- Pelttari, K., Pippenger, B., Mumme, M., Feliciano, S., Scotti, C., Mainil-Varlet, P., Procino, A., von Rechenberg, B., Schwamborn, T., Jakob, M., *et al.* (2014). Adult human neural crest-derived cells for articular cartilage repair. *Sci Transl Med* 6, 251ra119.
- Poppe, H., Rybalkin, S.D., Rehmann, H., Hinds, T.R., Tang, X.B., Christensen, A.E., Schwede, F., Genieser, H.G., Bos, J.L., Doskeland, S.O., *et al.* (2008). Cyclic nucleotide analogs as probes of signaling pathways. *Nat Methods* 5, 277-278.
- Proffitt, K.D., Madan, B., Ke, Z., Pendharkar, V., Ding, L., Lee, M.A., Hannoush, R.N., and Virshup, D.M. (2013). Pharmacological inhibition of the Wnt acyltransferase PORCN prevents growth of WNT-driven mammary cancer. *Cancer Res* 73, 502-507.
- Takamatsu, A., Ohkawara, B., Ito, M., Masuda, A., Sakai, T., Ishiguro, N., and Ohno, K. (2014). Verapamil protects against cartilage degradation in osteoarthritis by inhibiting Wnt/beta-catenin signaling. *PLoS One* 9, e92699.
- Umeda, K., Oda, H., Yan, Q., Matthias, N., Zhao, J., Davis, B.R., and Nakayama, N. (2015). Long-Term Expandable SOX9(+) Chondrogenic Ectomesenchymal Cells from Human Pluripotent Stem Cells. *Stem Cell Reports* 4, 712-726.
- Umeda, K., Zhao, J., Simmons, P., Stanley, E., Elefanty, A., and Nakayama, N. (2012). Human chondrogenic paraxial mesoderm, directed specification and prospective isolation from pluripotent stem cells. *Sci Rep* 2, 455.
- Wang, Y., and Nakayama, N. (2009). WNT and BMP signaling are both required for hematopoietic cell development from human ES cells. *Stem Cell Res* 3, 113-125.
- Wang, Y., Umeda, K., and Nakayama, N. (2010). Collaboration between WNT and BMP signaling promotes hemoangiogenic cell development from human fibroblast-derived iPS cells. *Stem Cell Res* 4, 223-231.
